# Supplementary material
Source: PubMed Central journal article supplement (PMC3393541)

## SUPPLEMENTAL FIGURES LEGENDS

### **Figure S1. Depletion of T cells by CD25 beads**

Depletion of CD25<sup>+</sup> cells using magnetic beads conjugated to an anti-CD25 antibody efficiently removed FoxP3<sup>+</sup> CD25<sup>+</sup> Tregs but minimally changed bulk CD8 and CD4 T cell populations. These results are representative of 15 control experiments.

### **Figure S2. Flow cytometry gating scheme for isolation of mononuclear cells subsets**

(A) Doublets were initially gated out using SSC-A vs SSC-H and monocytes were differentiated from T and B cells by scatter (FSC-A vs SSC-A). A dump channel was used containing viability dye and CD56. Monocytes were distinguished by expression of CD14. T cells were defined as CD3<sup>+</sup> and then either CD4<sup>+</sup> or CD8<sup>+</sup>. Tregs were defined as CD3<sup>+</sup> CD4<sup>+</sup> CD25<sup>hi</sup> CD127<sup>lo</sup> cells. B cells were defined as CD3<sup>-</sup> and CD19<sup>+</sup>. (B) DCs were distinguished using a separate staining panel using doublet discrimination and a dump channel containing viability dye, CD3, CD19, CD14, and CD56. Cells that were negative for staining by all of these reagents were then selected and the remaining population of cells were then distinguished based upon scatter and then pDCs defined as CD123<sup>+</sup> and mDCs as CD11c<sup>+</sup> HLA-DR<sup>+</sup>.

### **Figure S3. IL-10 secretion following stimulation of PMBCs with gag peptide pool**

PBMCs from a chronic untreated subject were stimulated with gag peptide pool or media alone and ICS was then performed. Shown is a representative experiment of four.

**Figure S4. Flow cytometry gating scheme for monocyte and T cell subset sorting**

Doublet discrimination was performed by using SSC-A vs SSC-H. Monocytes and T cells were then differentiated based upon scatter (FSC-A vs SSC-A) and monocytes were identified as dump negative (viability dye, CD56, CD19) and CD14<sup>+</sup>. Tregs were identified as dump negative, CD8<sup>-</sup> and CD25<sup>hi</sup> CD127<sup>lo</sup>.

**Figure S5. Effect of PDL-1 and CTLA-4 blockade on IL-10 production**

LPS stimulated PBMCs from 10 untreated, chronically HIV infected subjects were incubated with either an isotype control antibody or antibodies against PD-L1 (Panel A) or CTLA-4 (Panel B). Supernatants were then collected 3 days later and assessed for IL-10 by Luminex.

Figure S1

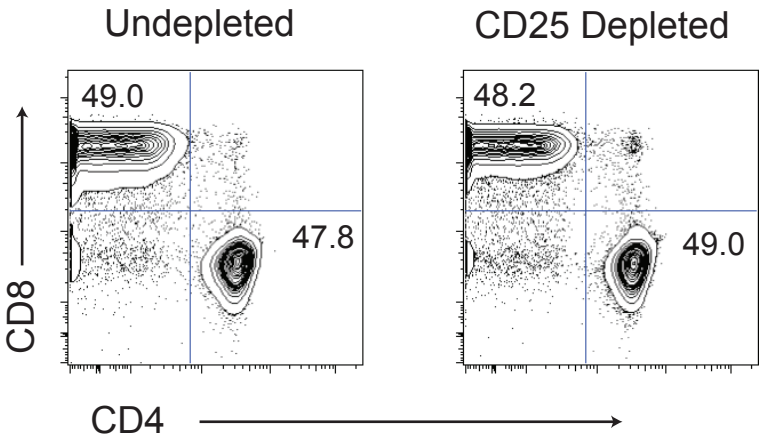

Figure S2

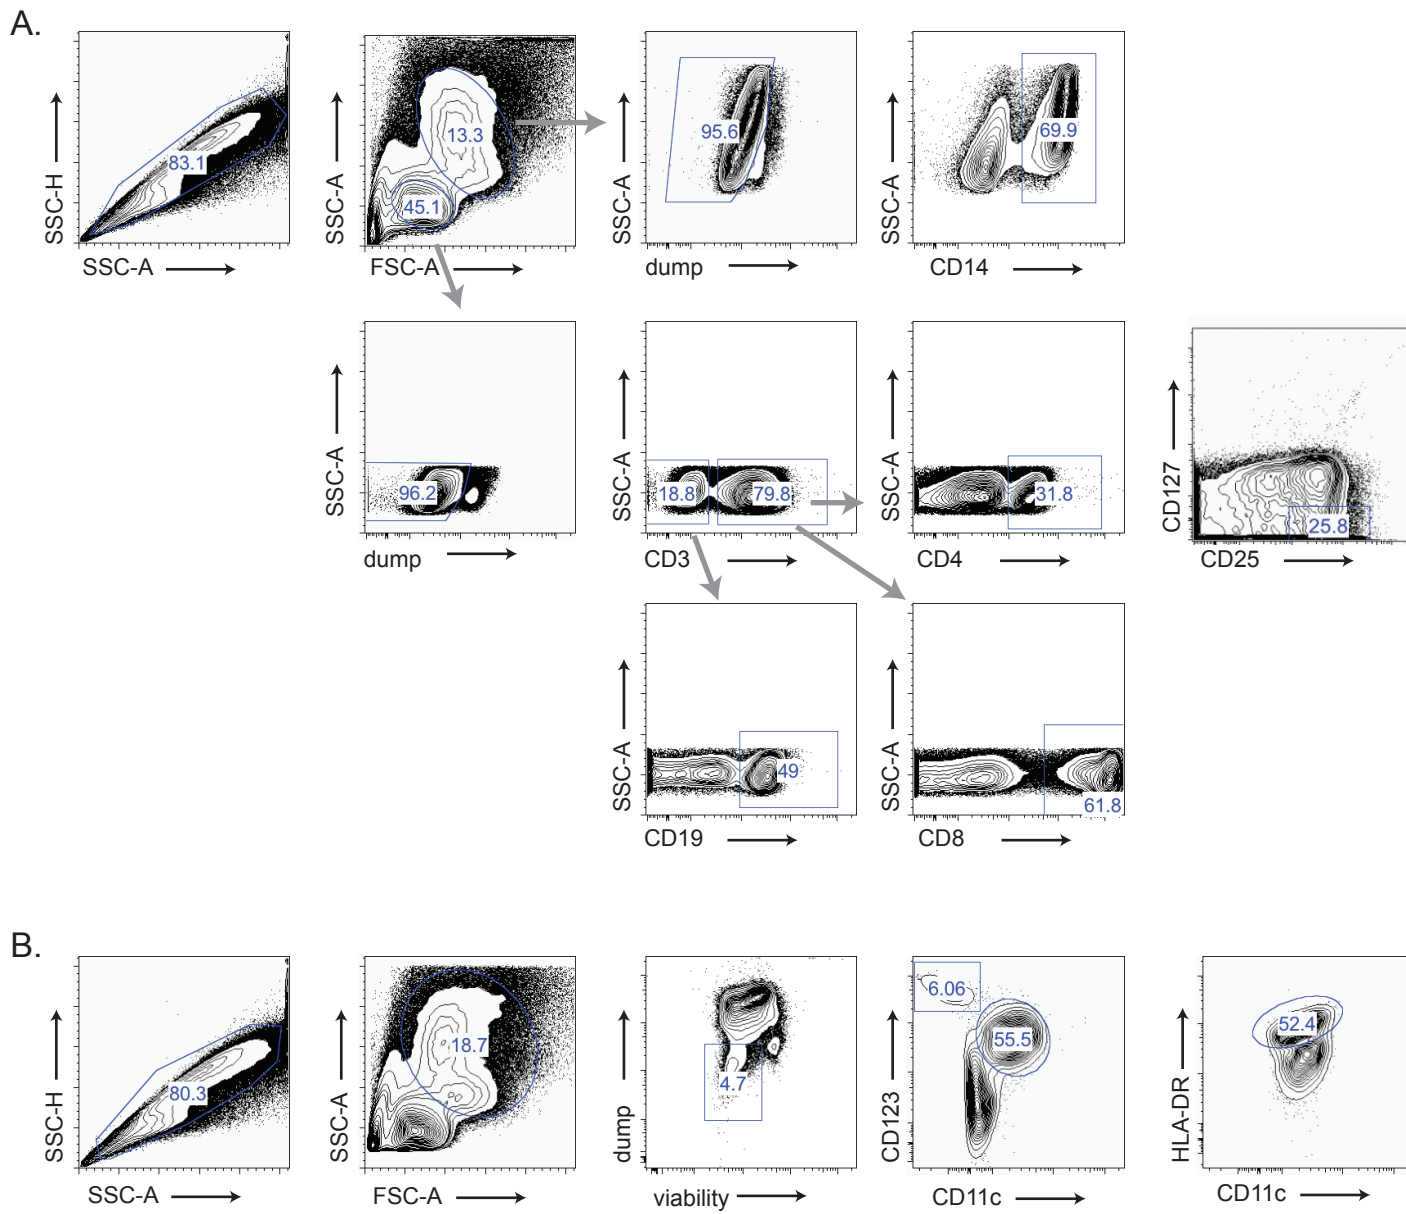

Figure S3

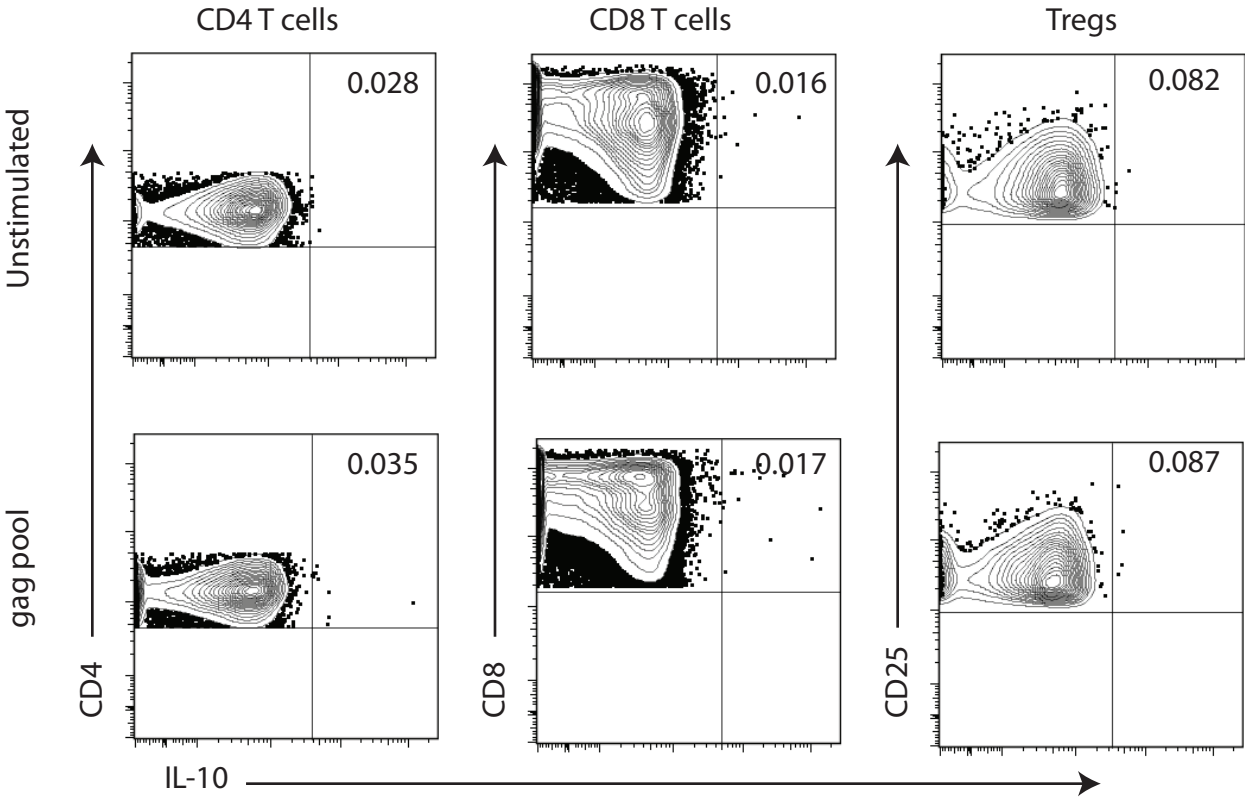

**Figure S4**

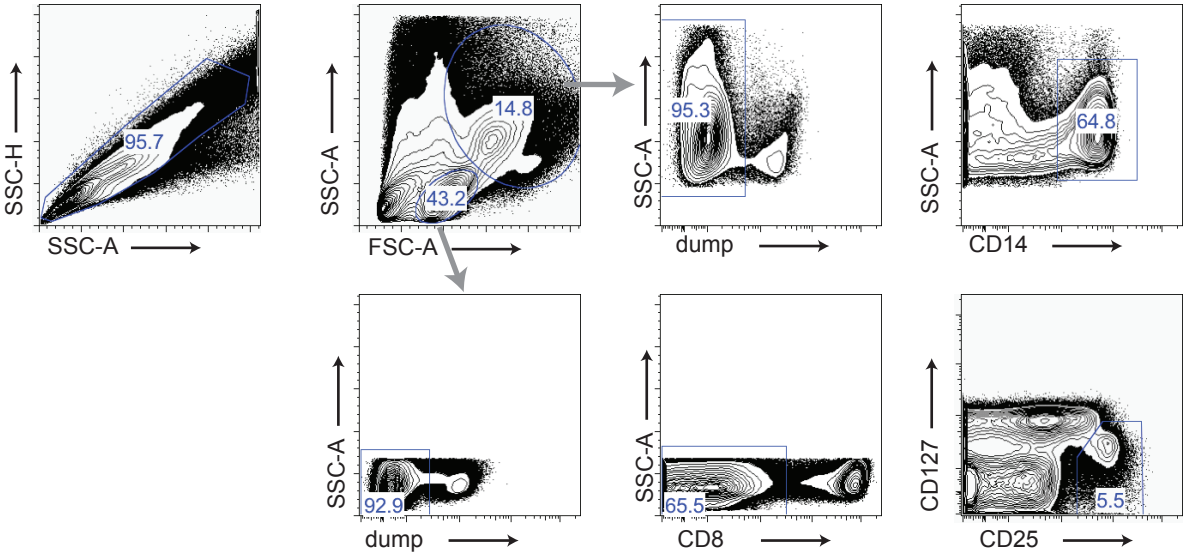

Figure S5

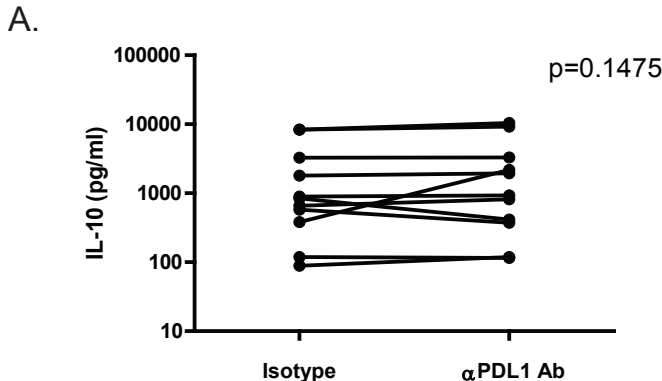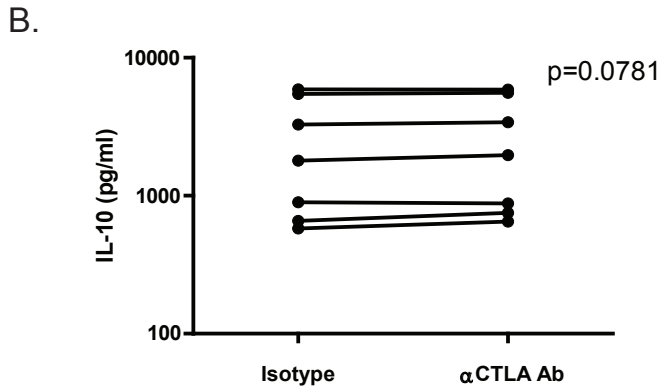

Supplement: supp_86.12.6586_FigS1-S5.pdf [file supp_86.12.6586_FigS1-S5.pdf]
